# Supplementary material for: Fear avoidance beliefs as a predictor for long-term sick leave, disability and pain in patients with chronic low back pain
Source: PubMed Central journal article supplement (PMC6278039; doi:10.1186/s12891-018-2351-9), 2018-12-03
Supplement: 12891_2018_2351_MOESM1_ESM.pdf [file 12891_2018_2351_MOESM1_ESM.pdf]

**Additional file 2: Table S2** Dropout analysis comparing baseline characteristics of patients included in the analysis of sick leave to those not included

| Variable                                                    | Included<br>(n=161) | Number of<br>responders | Missing<br>(n=114) | Number of<br>responders | Difference<br>(p-value) |
|-------------------------------------------------------------|---------------------|-------------------------|--------------------|-------------------------|-------------------------|
| Sex, female, n (%)                                          | 73 (45.34)          | 161                     | 41 (35.96)         | 114                     | 0.12                    |
| Age, years, mean (SD)                                       | 40.07 (10.89)       | 161                     | 36.72 (10.27)      | 114                     | 0.01*                   |
| Body Mass Index, mean (SD)                                  | 25.59 (4.30)        | 157                     | 26.46 (5.03)       | 110                     | 0.14                    |
| Education after primary school, n (%)                       |                     | 159                     |                    | 109                     | 0.30                    |
| <2 years                                                    | 43 (27.04)          |                         | 40 (36.70)         |                         |                         |
| 2-4 years                                                   | 103 (64.78)         |                         | 64 (58.72)         |                         |                         |
| >4 years                                                    | 4 (2.52)            |                         | 2 (1.83)           |                         |                         |
| Other                                                       | 9 (5.66)            |                         | 3 (2.75)           |                         |                         |
| Current smoker, no, n (%)                                   | 75 (47.17)          | 159                     | 48 (43.24)         | 111                     | 0.52                    |
| Alcohol, ≤7 units/week, n (%)                               | 120 (77.42)         | 155                     | 82 (77.36)         | 106                     | 0.99                    |
| Physical activity level leisure, n (%)                      |                     | 157                     |                    | 111                     | 0.08                    |
| Little-some                                                 | 130 (82.80)         |                         | 95 (85.59)         |                         |                         |
| Moderate-high                                               | 27 (17.20)          |                         | 16 (14.41)         |                         |                         |
| Sick leave, yes, n (%)                                      | 157 (100)           | 157                     |                    | -                       | -                       |
| Duration of sick leave, weeks, mean (SD)                    | 12.15 (17.55)       | 150                     |                    | -                       | -                       |
| Employment, no, n (%)                                       | 51 (32.48)          | 157                     | 46 (40.71)         | 113                     | 0.47                    |
| Compensation case, yes, n (%)                               | 30 (19.60)          | 153                     | 22 (20.56)         | 107                     | 0.85                    |
| Physical job demands, n (%)                                 |                     | 146                     |                    | 107                     | 0.05                    |
| None                                                        | 38 (26.02)          |                         | 23 (21.50)         |                         |                         |
| Little                                                      | 21 (14.38)          |                         | 15 (14.02)         |                         |                         |
| Some                                                        | 62 (42.47)          |                         | 35 (32.71)         |                         |                         |
| Heavy                                                       | 25 (17.12)          |                         | 34 (31.78)         |                         |                         |
| Physical health, 0-100, mean (SD)                           | 48.49 (7.86)        | 142                     | 50.03 (8.25)       | 95                      | 0.15                    |
| Mental health, 0-100, mean (SD)                             | 47.93 (10.07)       | 142                     | 47.89 (10.60)      | 95                      | 0.98                    |
| Depression, 0-4, mean (SD)                                  | 1.20 (0.81)         | 158                     | 1.28 (0.93)        | 109                     | 0.47                    |
| Anxiety, 0-4, mean (SD)                                     | 0.72 (0.65)         | 154                     | 0.82 (0.69)        | 109                     | 0.24                    |
| LBP <sup>1</sup> duration, <12 months, n (%)                | 93 (61.18)          | 152                     | 55 (49.44)         | 111                     | 0.60                    |
| Pain intensity, 0-30, mean (SD)                             | 17.81 (6.03)        | 159                     | 18.99 (4.92)       | 112                     | 0.08                    |
| Age at first episode of LBP <sup>1</sup> , years, mean (SD) | 30.77 (12.30)       | 150                     | 26.31 (10.60)      | 111                     | <0.01*                  |
| Family history of LBP <sub>1</sub> , yes, n (%)             | 72 (45.57)          | 158                     | 46 (41.07)         | 112                     | 0.46                    |
| Disability, 0-23, mean (SD)                                 | 15.00 (4.56)        | 161                     | 14.08 (4.71)       | 114                     | 0.11                    |
| FAB work <sup>2</sup> , 0-42, mean (SD)                     | 29.05 (9.92)        | 145                     | 30.38 (9.20)       | 100                     | 0.28                    |
| FAB physical activity <sup>3</sup> , 0-24, mean (SD)        | 16.15 (5.34)        | 149                     | 16.79 (5.32)       | 100                     | 0.35                    |
| Group, intervention, n (%)                                  | 92 (57.14)          | 161                     | 58 (50.88)         | 114                     | 0.30                    |

SD = standard deviation

\*p-value<0.05 indicates significant difference between the two samples

<sup>1</sup>Low back pain

<sup>2</sup>Fear avoidance beliefs about work

<sup>3</sup>Fear avoidance beliefs about physical activity
