# Supplementary material for: Fear avoidance beliefs as a predictor for long-term sick leave, disability and pain in patients with chronic low back pain
Source: PubMed Central journal article supplement (PMC6278039; doi:10.1186/s12891-018-2351-9), 2018-12-03
Supplement: 12891_2018_2351_MOESM2_ESM.pdf [file 12891_2018_2351_MOESM2_ESM.pdf]

**Additional file 3: Table S3** Dropout analysis comparing baseline characteristics of patients included in the analysis of disability to those not included

| Variable                                                    | Included<br>(n=369) | Number of<br>responders | Missing<br>(n=190) | Number of<br>responders | Difference<br>(p-value) |
|-------------------------------------------------------------|---------------------|-------------------------|--------------------|-------------------------|-------------------------|
| Sex, female, n (%)                                          | 185 (50.14)         | 369                     | 78 (41.05)         | 190                     | 0.04*                   |
| Age, years, mean (SD)                                       | 40.00 (10.41)       | 369                     | 36.77 (10.13)      | 190                     | <0.01*                  |
| Body Mass Index, mean (SD)                                  | 25.21 (4.22)        | 359                     | 26.17 (4.88)       | 184                     | 0.02*                   |
| Education after primary school, n (%)                       |                     | 363                     |                    | 185                     | <0.01*                  |
| <2 years                                                    | 66 (18.18)          |                         | 57 (30.81)         |                         |                         |
| 2-4 years                                                   | 262 (72.18)         |                         | 108 (58.38)        |                         |                         |
| >4 years                                                    | 18 (4.96)           |                         | 14 (7.57)          |                         |                         |
| Other                                                       | 17 (4.68)           |                         | 6 (3.24)           |                         |                         |
| Current smoker, no, n (%)                                   | 206 (56.44)         | 365                     | 93 (49.47)         | 188                     | 0.12                    |
| Alcohol, ≤7 units/week, n (%)                               | 273 (75.83)         | 360                     | 139 (77.22)        | 180                     | 0.72                    |
| Physical activity level leisure, n (%)                      |                     | 362                     |                    | 185                     | 0.23                    |
| Little-some                                                 | 275 (75.97)         |                         | 149 (80.54)        |                         |                         |
| Moderate-high                                               | 87 (24.03)          |                         | 36 (19.49)         |                         |                         |
| Sick leave, yes, n (%)                                      | 163 (44.66)         | 365                     | 105 (56.15)        | 187                     | 0.01*                   |
| Duration of sick leave, weeks, mean (SD)                    | 12.10 (17.26)       | 157                     | 12.98(13.41)       | 104                     | 0.64                    |
| Employment, no, n (%)                                       | 77 (21.21)          | 363                     | 50 (26.74)         | 187                     | 0.15                    |
| Compensation case, yes, n (%)                               | 55 (15.07)          | 350                     | 32 (17.58)         | 182                     | 0.57                    |
| Physical job demands, n (%)                                 |                     | 360                     |                    | 182                     | 0.06                    |
| None                                                        | 113 (31.39)         |                         | 50 (27.47)         |                         |                         |
| Little                                                      | 55 (15.28)          |                         | 22 (12.64)         |                         |                         |
| Some                                                        | 135 (37.60)         |                         | 63 (34.62)         |                         |                         |
| Heavy                                                       | 57 (15.83)          |                         | 46 (25.27)         |                         |                         |
| Physical health, 0-100, mean (SD)                           | 50.60 (8.57)        | 327                     | 50.99 (8.23)       | 168                     | 0.62                    |
| Mental health, 0-100, mean (SD)                             | 50.02 (10.29)       | 327                     | 49.71 (10.41)      | 168                     | 0.75                    |
| Depression, 0-4, mean (SD)                                  | 1.05 (0.82)         | 361                     | 1.18 (0.87)        | 183                     | 0.09                    |
| Anxiety, 0-4, mean (SD)                                     | 0.65 (0.64)         | 354                     | 0.74 (0.68)        | 182                     | 0.14                    |
| LBP <sub>1</sub> duration, <12 months, n (%)                | 187 (53.43)         | 350                     | 86 (47.51)         | 181                     | 0.20                    |
| Pain intensity, 0-30, mean (SD)                             | 17.42 (5.91)        | 366                     | 18.13 (5.12)       | 188                     | 0.14                    |
| Age at first episode of LBP <sup>1</sup> , years, mean (SD) | 28.96 (11.93)       | 355                     | 25.58 (11.06)      | 187                     | <0.01*                  |
| Family history of LBP <sup>1</sup> , yes, n (%)             | 162 (44.63)         | 363                     | 72 (38.92)         | 185                     | 0.20                    |
| Disability, 0-23, mean (SD)                                 | 13.81 (4.96)        | 369                     | 13.63 (4.92)       | 190                     | 0.68                    |
| FAB work <sup>2</sup> , 0-42, mean (SD)                     | 23.62 (11.33)       | 341                     | 25.66 (11.28)      | 173                     | 0.05                    |
| FAB physical activity <sup>3</sup> , 0-24, mean (SD)        | 15.14 (5.38)        | 346                     | 16.08 (5.22)       | 176                     | 0.06                    |
| Group, intervention, n (%)                                  | 210 (56.91)         | 369                     | 88 (46.32)         | 190                     | 0.02*                   |

SD = standard deviation

\*p-value<0.05 indicates significant difference between the two samples

<sup>1</sup>Low back pain

<sup>2</sup>Fear avoidance beliefs about work

<sup>3</sup>Fear avoidance beliefs about physical activity
