# Supplementary material for: Fear avoidance beliefs as a predictor for long-term sick leave, disability and pain in patients with chronic low back pain
Source: Springer Nature journal article supplement (doi:10.1186/s12891-018-2351-9), 2018-12-01
Supplement: MOESM3 [file 16312114]

**Additional file 4: Table S4** Dropout analysis comparing baseline characteristics of patients included in the analysis of pain to those not included

| Variable                                                    | Included<br>(n=363) | Number of<br>responders | Missing<br>(n=196) | Number of<br>responders | Difference<br>(p-value) |
|-------------------------------------------------------------|---------------------|-------------------------|--------------------|-------------------------|-------------------------|
| Sex, female, n (%)                                          | 181 (49.82)         | 363                     | 82 (41.84)         | 196                     | 0.07                    |
| Age, years, mean (SD)                                       | 39.81 (10.38)       | 363                     | 37.22 (10.31)      | 196                     | <0.01*                  |
| Body Mass Index, mean (SD)                                  | 25.21 (4.24)        | 353                     | 26.13 (4.83)       | 190                     | 0.03*                   |
| Education after primary school, n (%)                       |                     | 357                     |                    | 191                     | 0.01*                   |
| <2 years                                                    | 65 (18.21)          |                         | 58 (30.37)         |                         |                         |
| 2-4 years                                                   | 258 (72.27)         |                         | 112 (58.64)        |                         |                         |
| >4 years                                                    | 18 (5.04)           |                         | 14 (7.33)          |                         |                         |
| Other                                                       | 16 (4.48)           |                         | 7 (3.66)           |                         |                         |
| Current smoker, no, n (%)                                   | 154 (45.09)         | 359                     | 95 (48.87)         | 194                     | 0.17                    |
| Alcohol, ≤7 units/week, n (%)                               | 270 (76.06)         | 355                     | 142 (78.38)        | 185                     | 0.98                    |
| Physical activity level leisure, n (%)                      |                     | 356                     |                    | 191                     | 0.50                    |
| Little-some                                                 | 269 (75.56)         |                         | 155 (81.15)        |                         |                         |
| Moderate-high                                               | 87 (24.44)          |                         | 36 (18.85)         |                         |                         |
| Sick leave, yes, n (%)                                      | 160 (44.57)         | 359                     | 108 (55.95)        | 193                     | 0.14                    |
| Duration of sick leave, weeks, mean (SD)                    | 12.13 (17.34)       | 152                     | 12.92 (13.38)      | 107                     | 0.68                    |
| Employment, no, n (%)                                       | 76 (21.29)          | 357                     | 51 (26.42)         | 193                     | 0.17                    |
| Compensation case, yes, n (%)                               | 54 (15.65)          | 345                     | 33 (17.65)         | 187                     | 0.55                    |
| Physical job demands, n (%)                                 |                     | 355                     |                    | 187                     | 0.12                    |
| None                                                        | 111 (31.27)         |                         | 52 (27.81)         |                         |                         |
| Little                                                      | 54 (15.21)          |                         | 24 (12.83)         |                         |                         |
| Some                                                        | 133 (37.44)         |                         | 65 (34.76)         |                         |                         |
| Heavy                                                       | 57 (16.06)          |                         | 46 (24.60)         |                         |                         |
| Physical health, 0-100, mean (SD)                           | 50.65 (8.55)        | 322                     | 50.90 (8.29)       | 173                     | 0.75                    |
| Mental health, 0-100, mean (SD)                             | 50.11 (10.23)       | 322                     | 49.57 (10.52)      | 173                     | 0.58                    |
| Depression, 0-4, mean (SD)                                  | 1.05 (0.82)         | 357                     | 1.17 (0.87)        | 188                     | 0.11                    |
| Anxiety, 0-4, mean (SD)                                     | 0.64 (0.63)         | 349                     | 0.74 (0.70)        | 187                     | 0.10                    |
| LBP <sup>1</sup> duration, <12 months, n (%)                | 185 (53.47)         | 346                     | 88 (47.57)         | 185                     | 0.20                    |
| Pain intensity, 0-30, mean (SD)                             | 18.48 (5.87)        | 363                     | 18.00 (5.25)       | 191                     | 0.34                    |
| Age at first episode of LBP <sup>1</sup> , years, mean (SD) | 28.83 (11.82)       | 349                     | 25.92 (11.39)      | 193                     | 0.01*                   |
| Family history of LBP <sup>1</sup> , yes, n (%)             | 160 (44.81)         | 357                     | 74 (38.74)         | 191                     | 0.17                    |
| Disability, 0-23, mean (SD)                                 | 13.80 (4.97)        | 363                     | 13.66 (4.89)       | 196                     | 0.75                    |
| FAB work <sup>2</sup> , 0-42, mean (SD)                     | 23.64 (11.27)       | 335                     | 25.56 (11.40)      | 179                     | 0.07                    |
| FAB physical activity <sup>3</sup> , 0-24, mean (SD)        | 15.12 (5.39)        | 340                     | 16.08 (5.20)       | 182                     | 0.05                    |
| Group, intervention, n (%)                                  | 207 (57.02)         | 363                     | 91 (46.43)         | 196                     | 0.02*                   |

SD = standard deviation

\*p-value<0.05 indicates significant difference between the two samples

<sup>1</sup>Low back pain

<sup>2</sup>Fear avoidance beliefs about work

<sup>3</sup>Fear avoidance beliefs about physical activity
