# Supplementary material for: Fear avoidance beliefs as a predictor for long-term sick leave, disability and pain in patients with chronic low back pain
Source: Springer Nature journal article supplement (doi:10.1186/s12891-018-2351-9), 2018-12-01
Supplement: MOESM4 [file 16312114]

**Additional file 1: Table S1** Simpler model of the associations between fear avoidance beliefs at baseline and unsuccessful outcome at 12-month follow-up

| Variable                                                                                | Sick leave (n=136) |           | Disability (n=302) |            | Pain (n=316) |           |
|-----------------------------------------------------------------------------------------|--------------------|-----------|--------------------|------------|--------------|-----------|
|                                                                                         | OR                 | 95% CI    | OR                 | 95% CI     | OR           | 95% CI    |
| High fear avoidance beliefs about work, 0-42                                            | 1.06*              | 1.01-1.12 | 1.03*              | 1.00-1.06  | 1.04*        | 1.01-1.06 |
| Smoking                                                                                 |                    |           |                    |            |              |           |
| High pain intensity, 0-30                                                               |                    |           | 1.08**             | 1.02-1.14  |              |           |
| Low pain intensity, 0-30                                                                |                    |           |                    |            | 1.14**       | 1.08-1.20 |
| Low disability (log), 0-23                                                              |                    |           | 1.16**             | 1.09-1.25  |              |           |
| Duration of low back pain $\geq$ 12 months and little physical job demands <sup>#</sup> |                    |           | 3.85*              | 1.23-12.50 |              |           |
| Male and little physical job demands <sup>#</sup>                                       |                    |           |                    |            |              |           |

OR = Odds ratio, CI = confidence intervals, \*p-value<0.05, \*\*p-value<0.01, <sup>#</sup>interaction

The simpler model of the multiple logistic regression analyses containing only fear avoidance beliefs about work, fear avoidance beliefs about physical activity and the variables found significant in the final model in Table 4
